1 **Space use and movement of jaguar (*Panthera onca*) in western Paraguay**

2 Roy T McBride, Jr. <sup>a,1</sup>, Jeffrey J Thompson <sup>\*b,c,1</sup>

3 <sup>a</sup>*Faro Moro Eco Research, Departamento de Boquerón, Paraguay*

4 <sup>b</sup>*Consejo Nacional de Ciencia y Tecnología (CONACYT), Asunción, Paraguay*

5 <sup>c</sup>*Asociación Guyra Paraguay, Parque Ecológico Asunción Verde. Avda. Carlos Bóveda,*

6 *Asunción, Paraguay C.C:132*

7

8 <sup>1</sup>These authors contributed equally to this paper.

9 \*Corresponding author: [jthompson.py@gmail.com](mailto:jthompson.py@gmail.com)

10 Guyra Paraguay  
11 Parque Ecológico Asunción Verde. Avda. Carlos Bóveda  
12 Asunción, Paraguay C.C:132  
13 595 975 928079  
14 [jthompson.py@gmail.com](mailto:jthompson.py@gmail.com)

15

16 Faro Moro Eco Research  
17 Departamento de Boquerón, Paraguay  
18 [rocktmcbride@yahoo.com](mailto:rocktmcbride@yahoo.com)

19

20 Running title: Jaguar home ranges in Paraguay

21

22

23

24

25

26 **Abstract:** We estimated home range and core area size for jaguar (*Panthera onca*) in western  
27 Paraguay in the Dry Chaco, Humid Chaco and Pantanal using an autocorrelated kernel density  
28 estimator. Mean home range size was 818 km<sup>2</sup> (95% CI:425-1981) in the Dry Chaco and 237  
29 km<sup>2</sup> (95% CI:90-427) in the Humid Chaco/Pantanal. Core areas, defined as the home range area  
30 where use was equal to expected use, was consistent across sexes and systems represented on  
31 average by the 59% utility distribution isopleth (range:56-64%). Males had a higher probability  
32 of larger home ranges and more directional and greater daily movements than females  
33 collectively and within systems. The large home ranges in the Dry Chaco are attributable to the  
34 relatively low productivity of that semi-arid ecosystem and high heterogeneity in resource  
35 distribution while larger than expected home ranges in the Humid Chaco/Pantanal compared to  
36 home range estimates from the Brazilian Pantanal may be due to differences in geomorphology  
37 and hydrological cycle. The large home ranges of jaguars in western Paraguay and a low  
38 proportional area of protected areas in the region demonstrate the importance of private  
39 ranchland for the long-term conservation of the species.

40

41 **Keywords:** Adaptive kernel density estimation; home range; jaguar; *Panthera onca*; Paraguay

42

## 43 **Introduction**

44 Globally, apex predators, and the maintenance of their functional roles, are severely threatened  
45 due to anthropogenic pressures, particularly associated with large spatial needs to access  
46 sufficient prey to meet metabolic requirements and persecution (Ripple et al. 2014). Habitat  
47 conversion and degradation and over hunting of prey species increase spatial requirements of

48 apex predators, increasing conflict with humans and affecting social behavior, dispersal and  
49 habitat use (McDonald 1983; Crooks 2002; Cardillo et al. 2004; Ripple et al. 2014).  
50 Consequently, an understanding of the space use and movement ecology of apex predators is key  
51 to effective conservation decision making for these species.

52         The jaguar (*Panthera onca*) is the largest feline in the Americas, distributed from the  
53 southwestern United States to northern Argentina, although it presently occupies <50% of its  
54 original range, and <80% of the range outside of Amazonia, due to habitat loss and persecution  
55 (Sanderson et al. 2002; Zellar 2007; de la Torre et al. 2017). Given the contraction of the  
56 species' distribution, range-wide conservation efforts have focused upon maintaining  
57 connectivity among key populations throughout the species range (Sanderson et al. 2002;  
58 Rabinowitz and Zeller 2010), however, an effective implementation of this management  
59 approach is partly dependent upon a thorough understanding of the spatial and movement  
60 ecology of jaguars.

61         For a big cat the jaguar is relatively understudied (Brodie 2009), and although multiple  
62 studies have estimated jaguar home range size (Schaller and Crawshaw 1980; Rabinowitz and  
63 Nottingham 1986; Crawshaw and Quigley 1991; Crawshaw 1995; Scognamillo et al. 2002;  
64 Crawshaw et al. 2004; Silveira 2004; Cullen 2006; Azevedo and Murray 2007; Cavalcanti and  
65 Gese 2009; Tobler et al. 2013; Morato et al. 2016) and movements (Conde et al. 2010; Colchero  
66 et al. 2011; Sollman et al. 2011; Morato et al. 2016), there is still relatively little known about the  
67 species' spatial and movement ecology. Since anthropogenic factors drive jaguar occurrence  
68 throughout its range by determining habitat availability and quality (Zeller et al. 2012; Petracca  
69 et al. 2014a,b; Thompson and Martinez 2015) this conspicuous knowledge gap on how jaguars

70 perceive and use the landscape is of concern as it limits managers' ability to quantifiably design  
71 and manage conservation landscapes for the jaguar.

72       Of further concern is that until recently jaguar home range estimates likely  
73 underestimated space use as VHF-based estimates were based upon small number of locations,  
74 while GPS-based estimates failed to account for autocorrelation inherent in GPS telemetry data  
75 (Morato et al. 2016). Furthermore, only recently have movement parameters and quantitative  
76 assessment of home range residency been estimated for jaguar (Morato et al. 2016).  
77 Consequently, there is an important need for research that incorporates developing  
78 methodologies that account for and take advantage of autocorrelation in telemetry data to better  
79 quantify jaguar spatial and movement ecology.

80       Range-wide, the jaguar is considered near threatened (Caso et al. 2008), however, at the  
81 austral limit of its distribution the species is considered critically endangered in Argentina and  
82 endangered in Brazil and Paraguay. Although multiple studies have investigated space use by  
83 jaguar in Brazil and Argentina (Schaller and Crawshaw 1980; Crawshaw and Quigley 1991;  
84 Crawshaw 1995; Crawshaw et al. 2004; Silveira 2004; Cullen 2006; Azevedo and Murray 2007;  
85 Cavalcanti and Gese 2009; Morato et al. 2016) there has been no such research on the species in  
86 Paraguay despite a recognized need in the face of a rapid constriction in the species' distribution  
87 in relation to a country-wide expansion of the agricultural sector (Secretaría del Ambiente et al.  
88 2016) which has resulted in some of the highest rates of deforestation in the world (Hansen et al.  
89 2013).

90       Given the status of the jaguar in Paraguay, the lack of information on the spatial and  
91 movement ecology of the species is of concern within the context of continued habitat loss, the  
92 maintenance of in-country and trans-boundary connectivity of populations, and their implications

93 for the range-wide conservation of the jaguar. Consequently, we used GPS-based telemetry to  
94 study space use and movements of jaguars in western Paraguay in the Dry Chaco, Humid Chaco  
95 and Pantanal, the region with the largest jaguar population in the country. Moreover, we  
96 employed developing methodologies which allowed us to determine home range residency and  
97 account for autocorrelation in the data (Fleming et al. 2014, 2015; Calabrese et al. 2016), which  
98 in turn allowed for rigorous comparisons with estimates from other research employing the same  
99 methodologies (Morato et al. 2016).

100         Based upon carnivore ecology in general, and jaguar ecology specifically, we expected  
101 male home range and movement rates to be higher than females (Mikael 1989; Cavalcanti and  
102 Geese 2009; Conde et al. 2010; Sollmann et al. 2011; Morato et al. 2016) and that jaguars in the  
103 Dry Chaco would exhibit larger home ranges, higher movement rates, and more directional  
104 movement compared to those in the more productive habitats of the Humid Chaco and Pantanal  
105 (Mikael 1989; Fahrig 2007; Gutierrez-Gonzalez et al. 2012). Also, when comparing to other sites  
106 (Morato et al. 2016) we expected estimated from the Humid Chaco and Pantanal to be similar to  
107 those from the Brazilian Pantanal, while estimates from the Dry Chaco would be larger than  
108 those from more humid systems but possibly similar to jaguars from the Brazilian Cerrado due to  
109 biotic and abiotic similarities between systems. Apart from constituting an important  
110 contribution towards the conservation of jaguars within Paraguay, placing our results into a  
111 comparative context with research from neighboring countries will facilitate the efficacy of  
112 trans-boundary conservation efforts, with important implications for range-wide conservation  
113 strategies for jaguar.

114

## 115 **Materials and methods**

116 **Study area**

117 We conducted our study in three ecosystems in western Paraguay; Dry Chaco, Humid Chaco and  
118 Pantanal, (Figure 1). The Dry Chaco is comprised of xeric forest, savannas, and grasslands and  
119 the Humid Chaco and Pantanal are a mosaic of seasonally flooded grasslands, palm savanna and  
120 xerophilic woodlands on higher ground (Olson et al. 2001; Mereles et al. 2013). We note that  
121 delineations between the Humid Chaco and Pantanal differ (Olson et al. 2001; Mereles et al.  
122 2013), however, for our purposes the similarities between systems and among our study sites in  
123 those systems make this discrepancy moot and consequently we treat the Humid Chaco and  
124 Pantanal as a single system in our analysis.

125 The western half of Paraguay is generally semi-arid with a pronounced east–west  
126 gradient in precipitation and humidity which divides the Chaco into the Humid Chaco with  
127 precipitation approximately  $> 1000$  mm/year and the Dry Chaco with precipitation  $< 1000$   
128 mm/year (Olson et al. 2001). The Pantanal is also subjected to this east-west precipitation  
129 gradient; however, it and the Humid Chaco are also strongly effect by the hydrological cycles of  
130 the Rio Paraguay (Mereles et al. 2013).

131 In the Humid Chaco our study area was Estancia Aurora, a 30,000 ha cattle ranch in the  
132 north of the department of Villa Hayes and in the Pantanal on the 65,000 ha ranch Estancia  
133 Fortín Patria and on the 80,000 ha ranch Estancia Leda. In the central Dry Chaco, we worked on  
134 the 40,000 ha Faro Moro ranch and more northerly in the 7,200 km<sup>2</sup> Defensores del Chaco  
135 National Park and the neighboring 269,000 ha of ranchland of the consortium *Grupo Chovoreca*.

136 **Jaguar captures**

137 Jaguars were captured using trained hounds to tree or bay jaguars which were then anesthetized  
138 using a weight-dependent dose of a mix of ketamine hydrochloride and xylazine hydrochloride

139 injected by a dart shot from a tranquilizer gun (McBride and McBride 2007). Capture methods  
140 followed ASM protocols (Sikes 2016) and in > 60 captures and recaptures of jaguar and puma  
141 over the study period there were no deaths or noticeable injury to animals.

142 From 2002–2009 jaguars were fitted with Telonics Generation II, data stored-on-board,  
143 GPS collars (Telonics, Mesa, Arizona, USA) which were set to record locations at 4 hour  
144 intervals. Starting in 2009 we used Northstar GPS collars (D-cell, Northstar, King George,  
145 Virginia, USA) programmed to record locations at three or four hour intervals and in 2012 we  
146 switched to Telonics Generation III GPS collars (Telonics, Mesa, Arizona, USA) which were set  
147 to record locations daily every two hours from 1800 to 0600 hours.

#### 148 **Home range estimation**

149 Semi-variogram analysis, model selection and AKDE estimates were undertaken using the *ctmm*  
150 package (Calabrese et al. 2016) in R 3.3.2 (R Development Core Team 2010). Starting values  
151 derived from semi-variograms were used for maximum likelihood model fitting with model  
152 selection based upon Akaike Information Criteria, adjusted for small sample size (AICc), and  
153 model weights (Fleming et al. 2014, 2015; Calabrese et al. 2016). We accounted for data  
154 collected with an irregular sampling schedule from collars used starting in 2012 with the *dt*  
155 argument within the *variogram* function in the *ctmm* package (Calabrese et al. 2016).

156 Movement models tested were an independent identically distributed (IID) model which  
157 ignores autocorrelation in the data and is equivalent to kernel density estimation (KDE) (Worton  
158 et al. 1989), a random search model (Brownian motion) with no home range, Brownian motion  
159 within a home range (Ornstein–Uhlenbeck, OU), and Ornstein–Uhlenbeck motion with foraging  
160 (OUF) (Fleming et al. 2014; Calabrese et al. 2016). Both the OU and OUF models produce

161 estimates of home range size and home range crossing time, while the OUF model additionally  
162 estimates the velocity autocorrelation time scale (a measure of path sinuosity) and mean distance  
163 traveled (Fleming et al. 2014; Calabrese et al. 2016).

164 Home ranges were estimated using the best fit model for each individual using AKDE  
165 (Fleming et al. 2015; Calabrese et al. 2016). For comparison with home range estimates from  
166 previous research we estimated 95% KDE home ranges using the IID model and 95% Minimum  
167 Convex Polygons (MCP) home ranges using the adehabitatHR package in R (Calenge 2006)  
168 (Supplementary material Appendix 1).

### 169 **Core area estimation**

170 We estimated core areas of AKDE home ranges as the area encompassed within the isopleth  
171 where the proportional use of the estimated home range is equal to the predicted probability of  
172 use (Seaman and Powell 1990; Bingham and Noon 1997; Vander Wal and Rodgers 2012). We  
173 determined this by fitting an exponential curve to the isopleths of the utility distribution of each  
174 individual at 10% increments from 10% to 90%, and at the 95% and 99% isopleths of the AKDE  
175 home range and the proportional area of the home range that each of those isopleths  
176 encompassed based upon the area of the 99% home range estimate. We then determined the  
177 threshold where proportional home range size begins to increase at a rate greater than the  
178 probability of use (slope=1; Seaman and Powell 1990; Bingham and Noon 1997; Vander Wal  
179 and Rodgers 2012) to define the isopleth that represented the core area boundary.

### 180 **Statistical analyses**

181 For our statistical analysis we combined jaguars from the Humid Chaco and the Pantanal into a  
182 single group as the characteristics of the system are highly similar, the delineation between the



183 two systems is debatable (Olson et al. 2001; Mereles et al. 2013), and consequently jaguars from  
184 those systems are subjected to similar ecological and anthropogenic drivers. Additionally, only  
185 individuals that exhibited residency in their movement behavior through semi-variogram analysis  
186 and space use best explained by the OUF model were included in our comparative analysis of  
187 differences between sexes and ecosystems.

188 We used a fixed-effect one-way analysis of variance (ANOVA) in a Bayesian modeling  
189 framework to test for differences in estimates of home range size, home range crossing time,  
190 directionality in movement (velocity autocorrelation time scale) and mean daily distance traveled  
191 between sexes across systems, between systems (sexes combined), between sexes within a  
192 system, and between same sexes between systems. We tested normality using the Shapiro-Wilk  
193 test and log-transforming the data when its distribution did not meet assumptions of normality.

194 All analyses were undertaken in R 3.2.2. (R Development Core Team 2010) using  
195 WinBUGS (Lunn et al. 2000) and the *R2bugs* package (Sturtz et al. 2005) for the Bayesian  
196 analysis. We ran 3 chains in WinBUGS with 100,000 iterations and a 20,000 iteration burn-in  
197 period; confirming convergence by a scale reduction factor  $\leq 1.01$  and visual inspection of trace  
198 plots for lack of autocorrelation. We tested differences between groups by taking 10,000 random  
199 samples from posterior distributions for each group of interest, comparing the proportional  
200 frequency that posterior estimates parameters were greater for males than females overall and  
201 within systems, greater for all individuals, and between same sexes, in the Dry Chaco compared  
202 to the Humid Chaco/Pantanal.

203

## 204 **Results**

## 205 **Jaguar captures and data collection**

206 We captured and collared 35 jaguars from June 2002 to June 2014 of which 19 individuals  
207 provided sufficient data for analysis; 7 in the Dry Chaco (5 males, 2 females), 9 in the Humid  
208 Chaco (3 males, 6 females) and 3 in the Pantanal (1 male, 2 females) with estimated ages  
209 between 2 and 10 years (Table 1). Collars collected data between 52 and 439 days, obtaining  
210 from 148 to 3462 locations (Table 1). The length of the study period and the annual frequency of  
211 captures were dependent upon resource availability and logistical restraints that dictated captures  
212 and collar recovery.

## 213 **Home range, core area and movement parameter estimates.**

214 Best fitting models for the movement of jaguars were either the OU or OUF models with 16  
215 individuals demonstrating residency (Table 1). Estimated home range sizes varied between 86  
216 and 2,909 km<sup>2</sup> and core areas between 21-509 km<sup>2</sup>. Core areas were represented by a consistent  
217 proportion of the utility distribution; ranging between 56%-64% isopleths (Table 2).

218 Male and female mean home range size were 727 km<sup>2</sup> (95% CI:355-1954) and 255 km<sup>2</sup>  
219 (95% CI:90-578), respectively and 818 km<sup>2</sup> (95% CI:425-1981) and 237 km<sup>2</sup> (95% CI:90-427)  
220 for jaguars in the Dry Chaco and Humid Chaco/Pantanal, respectively (Fig. 2, Fig.3). In the Dry  
221 Chaco mean home range size for males was 925 km<sup>2</sup> (95% CI:424-2035) and 551 km<sup>2</sup> (95%  
222 CI:513-590) for females, while in the Humid Chaco/Pantanal the mean home range was 398 km<sup>2</sup>  
223 (95% CI:345-427) and 156 km<sup>2</sup> (95% CI:90-267) for males and females, respectively (Fig. 4).

224 Males demonstrated larger home ranges ( $P=0.99$ ), higher daily movement ( $P=0.84$ ),  
225 greater directionality in movement (velocity autocorrelation time scale) ( $P=0.84$ ) and lower  
226 home range crossing times ( $P=0.9$ ) (Table 2, Figure 2). Between systems, home ranges were

227 larger ( $P=1$ ), movements more directional ( $P=0.99$ ) and home range crossing times greater  
228 ( $P=0.77$ ) in the Dry Chaco, while daily travel distance was similar between systems but with a  
229 slightly higher probability of being larger in the Dry Chaco ( $P= 0.61$ , Figure 3).

230         Between systems males in the Dry Chaco had higher probabilities to have larger home  
231 ranges ( $P=0.91$ ), higher home range crossing time ( $P=0.75$ ), greater directionality in movement  
232 ( $P=0.86$ ), and greater daily travel distances ( $P=0.72$ ) (Table 2), although values for all  
233 parameters were more variable in males from the Dry Chaco (Figure 4). A similar pattern was  
234 evident between females in both systems for home range size ( $P=0.99$ ), home range crossing  
235 time ( $P=0.89$ ) and directionality in movement ( $P=0.96$ ) which were greater for females in the  
236 Dry Chaco, however, females in the Dry Chaco had lower daily movements ( $P=0.23$ ) than those  
237 in the Humid Chaco/Pantanal (Table 4).

238

## 239 **Discussion**

240 We present the first estimates of movement parameters and home range and core area for jaguar  
241 in the Dry Chaco, Humid Chaco, and Paraguayan Pantanal, which furthermore take advantage of  
242 developing methods to empirically test for home range residency and account for autocorrelation  
243 in telemetry data when estimating space use (Fleming et al. 2014. 2015; Calabrese et al. 2016).  
244 Our results include the largest home range estimates recorded for jaguar (Dry Chaco) and, as  
245 expected, jaguars in the more productive Humid Chaco/Pantanal had smaller home ranges, lower  
246 movement rates and had less directionality in movements compared to jaguars in the Dry Chaco.  
247 Also, consistent with previous research males had larger home ranges, higher movement rates  
248 and more directional movements than females overall and within systems.

249 Overall and between systems male home ranges were larger than females which was  
250 expected (Calvalcanti and Gese 2009; Sollmann et al. 2011; Morato et al. 2016) as smaller home  
251 ranges of females are driven by food availability in relation to reproductive and offspring rearing  
252 needs which in-turn drives larger male home ranges towards optimizing reproductive  
253 opportunities (Mikael 1989; Sunquist and Sunquist 1989). This relationship is further supported  
254 by our estimated movement parameters which showed that males traveled farther, faster, and  
255 more directionally than females in utilizing home ranges.

256 Consistent with our expectations home range sizes of jaguars in the Dry Chaco were  
257 larger than in the Humid Chaco and Pantanal, overall and between sexes within systems where  
258 male home ranges were greater than females. The larger home ranges in the Dry Chaco are  
259 attributable to the lower productivity of that semi-arid ecosystem, more heterogeneously  
260 distributed prey and water, and negative effects of anthropogenic factors (i.e., deforestation;  
261 Fahrig 2007; Gutierrez-Gonzalez et al. 2012). The difference between sexes within systems is  
262 attributable to differences in territorial organization stemming from aforementioned reproductive  
263 and social needs (Mikael 1989; Sunquist and Sunquist 1989).

264 Home range estimates from the Dry Chaco for both males and females are considerably  
265 larger than other estimates from this study and Morato et al. (2016), although our estimates of  
266 male home range size from the Dry Chaco (mean:925 km<sup>2</sup>, 95% CI:424-2035) are consistent  
267 with the estimate for a single male from the Brazilian Cerrado (1269 km<sup>2</sup>), a semi-arid ecosystem  
268 with environmental and land use similarities to the Gran Chaco. Morato et al. (2016)  
269 demonstrated that increasing home range size of jaguars was associated with lower habitat  
270 quality, which is consistent with the very large home ranges from the Dry Chaco which were

271 closest in size to Morato et al's (2016) home ranges in the Atlantic forest which they considered  
272 to be of the lowest habitat quality of their study areas.

273 We expected home range sizes from the Humid Chaco/Pantanal to be similar to estimates  
274 from the Brazilian Pantanal, however, our estimates were 59% and 112% larger for males and  
275 females, respectively than home ranges reported for the Brazilian Pantanal; falling between  
276 estimates from the Amazon and Atlantic forest, although most similar to jaguars from the  
277 Amazon (Morato et al. 2016; Fig. 5). These differences may be related to differences in the  
278 geomorphology of the two regions and its interaction with the local hydrological cycles.

279 The Paraguayan Pantanal and our study area in the Humid Chaco have less forest area  
280 and a relatively greater area of inundated land during a large portion of the year compared to the  
281 Pantanal study areas of Morato et al. (2016) in Brazil. Consequently, the reduced forest area,  
282 with smaller and more isolated forest patches during annual flooding, could drive the  
283 comparatively larger home ranges observed in the Paraguayan Pantanal and Humid Chaco,  
284 although reduced jaguar densities resulting from persecution may also play a role in liberating  
285 available space and permitting greater space use.

286 Differences in the mean movement parameters were evident between jaguars in the  
287 Humid Chaco/Pantanal and in the Brazilian Pantanal whereby movements were more directional  
288 in the Humid Chaco/Pantanal, although still relatively sinuous but most similar to jaguars in the  
289 Atlantic forest, while daily movements were very similar to those in the Amazon (Fig. 6).  
290 Jaguars in the Dry Chaco had high movement rates and directionality in movement, similar to  
291 individuals in the Amazon from seasonally flooded forests (Morato et al. 2016).

292 We believe that these similarities are responses to movements among sporadically  
293 distributed critical resources despite the large differences in ecosystem characteristics.  
294 Conversely, although daily movement rate of jaguars in the Humid Chaco/Pantanal were similar  
295 to those in the Dry Chaco and Amazon, the relatively low directionality demonstrated by jaguars  
296 in the Humid Chaco/Pantanal suggests that, although jaguars are covering relatively large areas,  
297 movements are in response to more homogenously distributed resources within home ranges.

298 Core areas, as measured by the utility distribution isopleth were highly similar across  
299 systems and sexes, encompassed on average by the 59% isopleth (95% CI:56-64%), which  
300 represented on average 29% (95% CI:21-34%) of total home range area. This indicates that  
301 despite home range size, sex, or system jaguars are most intensively using about a third of their  
302 home range area. Additionally, our results suggests a cautious interpretation of arbitrarily  
303 defined core area delimitations, typically assigned to the 50% utility distribution isopleths which  
304 falls outside of the 95% confidence limits of our estimates (Powell 2012).

305 In light of the extensive deforestation that is occurring in the Dry Chaco of western  
306 Paraguay, the large home ranges that we observed in this system, which are consistent with the  
307 estimated low density of jaguar in the Bolivian Dry Chaco (Noss et al. 2012), are of concern as  
308 they demonstrate the large forested area that jaguars in the Dry Chaco require. In the Humid  
309 Chaco/Pantanal spatial requirement of jaguars were greater than expected based on estimates  
310 from the Brazilian Pantanal, which suggests lower than expected densities in these systems in  
311 Paraguay and cautions against extrapolating population parameter estimates from other regions  
312 within the Pantanal to the Rio Paraguay flood plain in Paraguay.

313           In both the Dry Chaco and the Humid Chaco/Pantanal we recognize that there may be an  
314 important effect on space use caused by reduced jaguar densities from persecution which is  
315 pervasive throughout western Paraguay, illustrated by our confirmation, or high probability, of  
316 ~75% of our study animals being killed due to persecution. Persecution is common throughout  
317 the range of the jaguar, however, its practice and magnitude is not equivocal geographically and  
318 consequently how the removal of individuals may impact space use, and subsequently  
319 comparisons among ecosystems and regions, needs to be considered and is of interest for future  
320 research.

321           The large spatial requirements of jaguars in western Paraguay, particularly in the Dry  
322 Chaco, indicate that the protected areas of the region which, represent <5% of the total regional  
323 area are likely insufficient to maintain a viable regional population, especially in light of the  
324 level of persecution on private lands. This highlights an urgent need to mitigate jaguar-human  
325 conflict in the region by actively including the livestock production sector in the conservation  
326 decision making process. Furthermore, given continuing deforestation, conservation initiatives  
327 need to take into account the large spatial needs of jaguar in western Paraguay by recognizing  
328 and incorporating the role of private lands in the long-term conservation of the species in  
329 Paraguay and in maintaining trans-boundary connectivity among populations.

330

### 331 **Acknowledgements**

332 We thank DVM Sybil Zavala, Cougar McBride and Caleb McBride for assistance in the field  
333 and the many sportsman and conservationist who contributed to supporting this work. This  
334 research was conducted under the permission of the Secretariat of the Environment (SEAM) of

335 Paraguay. JTT was supported by the Consejo Nacional de Ciencia y Tecnología of Paraguay  
336 (CONACYT).

337

## 338 **References**

- 339 Azevedo, F. C. C. and D. L.,Murray. 2007. Spatial organization and food habits of jaguars  
340 (*Panthera onca*) in a floodplain forest. *Biol. Conserv.* 137:391–401.
- 341 Bingham, B.B. and B.R. Noon. 1997. Mitigation of habitat “take”: Application to habitat  
342 conservation planning. *Conserv Biol.* 11:127-139.
- 343 Brodie, J.F. 2009. Is research effort allocated efficiently for conservation? Felidae as a global  
344 case study. *Biodivers Conserv.* 18:2927–2939.
- 345 Calabrese, J.M., C.H. Fleming and E. Gurarie. 2016. Ctm: an R package for analyzing animal  
346 relocation data as a continuous-time stochastic process. *Methods Ecol Evol.* 7:1124-1132.
- 347 Calenge, C. 2006. The package adehabitat for the R software: a tool for the analysis of space and  
348 habitat use by animals. *Ecol Model.* 197:516-519.
- 349 Cardillo, M., A. Purvis, W. Sechrest, J.L. Gittleman, J. Bielby and G.M. Mace. 2004. Human  
350 population density and extinction risk in the world's carnivores. *PLOS Biology* 2(7): e197. doi:  
351 10.1371/journal.pbio.0020197.
- 352 Caso, A., C. Lopez-Gonzalez,, E. Payan, E. Eizirik, T. de Oliveira, R. Leite-Pitman, M. Kelly  
353 and C. Valderrama, 2008. *Panthera onca*. The IUCN Red List of Threatened Species 2008:  
354 e.T15953A5327466. <http://dx.doi.org/10.2305/IUCN.UK.2008.RLTS.T15953A5327466.en>.
- 355 Cavalcanti, S.M.C. and E.M. Gese. 2009. Spatial ecology and social interactions of jaguars  
356 (*Panthera onca*) in the southern Pantanal, Brazil. *J. Mammal.* 90:935–945.



357 Colchero, F., D. Conde, C. Manterola, C. Chávez, A. Rivera and G. Ceballos 2011. Jaguars on  
358 the move: Modeling movement to mitigate fragmentation from road expansion in the Mayan  
359 Forest. *Anim Conserv.* 14:158-166.

360 Conde, D.A., F. Colchero, H. Zarza, N.L. Christensen, J.O. Sexton, C. Manterola, C. Chávez, A.  
361 Rivera, D. Azuara and G. Ceballos. 2010. Sex matters: Modeling male and female habitat  
362 differences for jaguar conservation. *Biol Conserv.* 143, 1980-1988.

363 Crawshaw, Jr., P.G. 1995. Comparative ecology of ocelot (*Felis pardalis*) and jaguar (*Panthera*  
364 *onca*) in a protected subtropical forest in Brazil and Argentina. Ph.D. dissertation, University of  
365 Florida. Gainesville, Florida, USA.

366 Crawshaw Jr., P.G. and H.B. Quigley. 1991. Jaguar spacing, activity, and habitat use in a  
367 seasonally flooded environment in Brazil. *J. Zool.* 223, 357–370.

368 Crawshaw, Jr., P.G., J.K. Mahler, Indrusiak, S.M.C. Cavalcanti, M.R.P. Leite-Pitman and K. M.  
369 Silvius. 2004. Ecology and conservation of the jaguar (*Panthera onca*) in Iguaçu National Park,  
370 Brazil. In: (Silvius, K.M., R. E. Bodmer and J.M.V. Fragoso, eds.). *People in nature: wildlife*  
371 *conservation in South and Central America*. Columbia University Press, New York. pp. 286–  
372 296.

373 Crooks, K.R., 2002. Relative sensitivities of mammalian carnivores to habitat fragmentation.  
374 *Conserv Biol.* 16, 488-502.

375 Cullen Jr., L., 2006. Jaguar as landscape detectives for the conservation in the Atlantic Forest of  
376 Brazil. Ph.D. dissertation. University of Kent, UK.

377 de la Torre, J.A., J.F. González-Maya, H. Zarza, G. Ceballos and R.A. Medellín, 2017. The  
378 jaguar's spots are darker than they appear: assessing the global conservation status of the jaguar  
379 *Panthera onca*. *Oryx*.1-16. doi:10.1017/S0030605316001046

380 Fahrig, L., 2007. Non-optimal animal movement in human-altered landscapes. *Funct Ecol.* 21,  
381 1003-1015.

382 Fleming, C.H., J.M. Calabrese, T. Mueller, K.A. Olson, P. Leimgruber and W.F. Fagan. 2014.  
383 From fine-scale foraging to home ranges: a semivariance approach to identifying movement  
384 modes across spatiotemporal scales. *Am Nat.* 183: E154-E167.

385 Fleming, C.H., W.F. Fagan, T. Mueller, K.A. Olson, P. Leimgruber and J.M. Calabrese. 2015.  
386 Rigorous home range estimation with movement data: a new autocorrelated kernel density  
387 estimator. *Ecology.* 96, 1182-1188.

388 Gutiérrez-González, C.E., M.Á. Gómez-Ramírez and C.A. López-González. 2012. Estimation of  
389 the density of the near threatened jaguar *Panthera onca* in Sonora, Mexico, using camera trapping  
390 and an open population model. *Oryx*, 46, 431-437.

391 Hansen, M.C., P.V. Potapov, R. Moore, M. Hancher, S.A. Turubanova, A. Tyukavina, D. Thau,  
392 S.V. Stehman, S.J. Goetz, T.R. Loveland and A. Kommareddy. 2013. High-resolution global  
393 maps of 21st-century forest cover change. *Science*, 342, 850-853.

394 Lunn, D.J., A. Thomas, N. Best and D. Spiegelhalter. 2000. WinBUGS – a Bayesian modelling  
395 framework: concepts, structure, and extensibility. *Stat Comput*, 10, 325-337.

396 McBride, Jr., R.T. and R.T. McBride. 2007. Safe and selective capture technique for jaguars in  
397 the Paraguayan Chaco. *Southwest Nat.* 52, 570-577.

398 Macdonald, D.W. 1983. The ecology of carnivore social behaviour. *Nature.* 301, 379-384.

399 Mereles, F., J.L. Cartes, R.P. Clay, P. Cacciali, C. Paradedda, O. Rodas and A. Yanosky, 2013.  
400 Análisis cualitativo para la definición de las ecorregiones de Paraguay occidental. *Paraquaria*  
401 *Natural.* 1, 12-20.

402 Mikael, S. 1989. The mating tactics and spacing patterns of solitary carnivores, In: (Gittleman,  
403 J.L.,ed.). Carnivore behavior, ecology, and evolution. Cornell University Press, New York. pp.  
404 164-182.

405 Morato, R.G., J.A. Stabach, C.H. Fleming, J.M. Calabrese, R.C. De Paula, K.M. Ferraz, D.L.  
406 Kantek, S.S. Miyazaki, T.D. Pereira, G.R. Araujo, A. Paviolo, C. De Angelo, M.S. Di Bitetti, P.  
407 Cruz, F. Lima, L. Cullen, D.A. Sana, E.E. Ramalho, M.M. Carvalho, F.H.S. Soares, B. Zimbres,  
408 M.X. Silva, M.D.F. Moraes, A. Vogliotti, J.A. May, Jr., M. Haberfeld, L. Rampim, L. Sartorello,  
409 M.C. Ribeiro and P. Leimgruber. 2016. Space Use and Movement of a Neotropical Top  
410 Predator: The Endangered Jaguar. PloS one, 11(12), p.e0168176.

411 Noss, A.J., B. Gardner, L. Maffei, E. Cuéllar, R. Montaña, A. Romero-Muñoz, R. Sollman and  
412 A.F. O'Connell. 2012. Comparison of density estimation methods for mammal populations with  
413 camera traps in the Kaa-Iya del Gran Chaco landscape. Anim Conserv. 15, 527-535.

414 Olson, D.M., E. Dinerstein, E.D. Wikramanayake, N.D. Burgess, G.V. Powell, E.C. Underwood,  
415 J.A. D'amico, I. Itoua, H.E. Strand, J.C. Morrison and C.J. Loucks. 2001. Terrestrial Ecoregions  
416 of the World: A New Map of Life on Earth: A new global map of terrestrial ecoregions provides  
417 an innovative tool for conserving biodiversity. BioScience, 51, 933-938.

418 Petracca, L.S., S. Hernández-Potosme, L. Obando-Sampson, R. Salom-Pérez, H. Quigley and  
419 H.S. Robinson. 2014a. Agricultural encroachment and lack of enforcement threaten connectivity  
420 of range-wide jaguar (*Panthera onca*) corridor. J Nat Conserv. 22, 436-444.

421 Petracca, L.S., O.E. Ramírez-Bravo and L. Hernández-Santín. 2014b. Occupancy estimation of  
422 jaguar *Panthera onca* to assess the value of east-central Mexico as a jaguar corridor. Oryx, 48,  
423 133-140.

- 424 Powell, R.A. 2012. Movements, home ranges, activity, and dispersal, In: (Boitani, L. and R.A.  
425 Powell, eds.), *Carnivore ecology and conservation: a handbook of techniques*. Oxford University  
426 Press, London, United Kingdom. pp. 188-217.
- 427  
428 R Development Core Team, 2010. *R: A language and environment for statistical computing*. R  
429 Foundation for Statistical Computing, Vienna, Austria.
- 430 Rabinowitz, A.R. and B.G. Nottingham. 1986. Ecology and behavior of the jaguar (*Panthera*  
431 *onca*) in Belize, Central America. *J Zool.* 210, 149–159.
- 432 Rabinowitz, A. and K.A. Zeller. 2010. A range-wide model of landscape connectivity and  
433 conservation for the jaguar, *Panthera onca*. *Biol. Conserv.* 143, 939–945.
- 434 Ripple, W.J., J.A. Estes, R.L. Beschta, C.C. Wilmers, E.G., Ritchie, M. Hebblewhite, J. Berger,  
435 B. Elmhagen, M. Letnic, M.P. Nelson and O.J. Schmitz. 2014. Status and ecological effects of  
436 the world's largest carnivores. *Science.* 343(6167), 1241484.
- 437 Sanderson, E.W., K.H. Redford, C.B. Chetkiewicz, R.A. Medellin, A.R. Rabinowitz, , J.G.  
438 Robinson and A.B. Taber. 2002. Planning to save a species: the jaguar as a model. *Conserv.*  
439 *Biol.* 16, 58–71.
- 440 Schaller, G.B. and P.G. Crawshaw, Jr. 1980. Movement patterns of jaguar. *Biotropica* 12, 161–  
441 168.
- 442 Secretaría del Ambiente, Wildlife Conservation Society Paraguay and Itaipu Binacional, 2016.  
443 Plan de Manejo de la *Panthera onca*, Paraguay 2017-2026. First ed., Asunción, Paraguay.
- 444 Seaman, D.E. and R.A. Powell. 1990. Identifying patterns and intensity of home range use.  
445 *Bears: their biology and management* Vol. 8, A Selection of Papers from the Eighth International  
446 Conference on Bear Research and Management. Victoria, British Columbia, Canada, February  
447 1989. International Association of Bear Research and Management. pp.243-249.

448 Scognamillo, D., I. Maxit, M. Sunquist and L. Farrell. 2002. Ecología del jaguar y el problema  
449 de la depredación de ganado en un hato de los llanos venezolanos. In: (Medellin, R., C. Equihua,  
450 C.L.B. Chetkiewicz, P.G. Crawshaw, Jr., A. Rabinowitz, K.H. Redford, J.G. Robinson, E.W.  
451 Sanderson and A.B. Taber, eds.), El jaguar en el nuevo milenio. Universidad Nacional  
452 Autónoma de México and Wildlife Conservation Society, Distrito Federal, México. pp. 139–150  
453 Sikes, R.S. 2016. Guidelines of the American Society of Mammalogists for the use of wild  
454 mammals in research and education. *J Mammal.* 97, 663-688.  
455 Silveira, L. 2004. Ecologia Comparada e Conservação da Onça-pintada (*Panthera onca*) e Onça-  
456 parda (*Puma concolor*), no Cerrado e Pantanal. Ph.D. Dissertation, University of Brasilia,  
457 Brasilia, Brasil.  
458 Sollmann, R., M.M. Furtado, B. Gardner, H. Hofer, A.T. Jácomo, , N.M. Tôrres, and L.  
459 Silveira. 2011. Improving density estimates for elusive carnivores: accounting for sex-specific  
460 detection and movements using spatial capture–recapture models for jaguars in central Brazil.  
461 *Biol Conserv.*, 144, 1017-1024.  
462 Sturtz, S., U. Ligges and A. Gelman. 2005. R2WinBUGS: A Package for Running WinBUGS  
463 from R. *J Stat Soft.*, 12, 1-16.  
464 Sunquist, M.E. and F.C. Sunquist.1989. Ecological constraints on predation by large felids. In:  
465 (Gittleman, J.L., ed.), *Carnivore behavior, ecology, and evolution*. Cornell University Press,  
466 Ithaca, New York. pp. 283–301  
467 Thompson, J.J. and C. Martínez Martí. 2015. Patterns and determinants of jaguar (*Panthera*  
468 *onca*) occurrence in habitat corridors at the southwestern extent of the species range. In:  
469 (Martínez Martí, C., ed.), *Cats, Cores and Corridors: A survey to assess the status of Jaguars and*  
470 *their habitat in the southernmost part of their range*. Panthera. New York. pp. 26-40.

471 Tobler, M.W., S.E. Carrillo-Percastegui, A.Z. Hartley, and G.V. Powell, 2013. High jaguar  
472 densities and large population sizes in the core habitat of the southwestern Amazon. *Biol*  
473 *Conserv*, 159, 375-381.

474 Vander Wal, E. and A.R. Rodgers. 2012. An individual-based quantitative approach for  
475 delineating core areas of animal space use. *Ecol Model*. 224, 48–53.

476 Zeller, K.A. 2007. *Jaguars in the New Millennium Data Set Update: The State of the*  
477 *Jaguar in 2006*. Wildlife Conservation Society, Bronx, New York.

478 Zeller, K.A., S. Nijhawan, R. Salom-Pérez, S.H. Potosme, and J.E. Hines. 2011. Integrating  
479 occupancy modeling and interview data for corridor identification: a case study for jaguars in  
480 Nicaragua. *Biol Conserv*. 144, 892–901.

481

482

483

484

485

486

487

488

489 Table 1. Sex, age, sample characteristics and estimated movement parameters, AKDE home  
 490 range, core area and core area utility distribution isopleths for study jaguars in the Paraguayan  
 491 Dry Chaco, Humid Chaco and Pantanal.

| ID                          | Sex/age<br>(yr) | Number<br>of<br>fixes/days | Velocity<br>autocorre-<br>lation<br>timescale<br>(h) | Home<br>range<br>crossing<br>time<br>(days) | Average<br>distance<br>traveled<br>(km/day) | Home range (km <sup>2</sup> )<br>(95% CI) | Core<br>(km <sup>2</sup> ) | Core area<br>isopleths<br>(%) |
|-----------------------------|-----------------|----------------------------|------------------------------------------------------|---------------------------------------------|---------------------------------------------|-------------------------------------------|----------------------------|-------------------------------|
| <i>Dry Chaco</i>            |                 |                            |                                                      |                                             |                                             |                                           |                            |                               |
| DC1                         | M/5             | 1094/376                   | 1.1                                                  | 8.0                                         | 28.8                                        | 2143 (1558-2820)                          | 504                        | 59                            |
| DC3                         | M/2             | 722/363                    | 1.8                                                  | 11.5                                        | 7.9                                         | 421 (288-580)                             | 107                        | 63                            |
| DC4                         | M/5             | 620/82                     | 1.9                                                  | 3.5                                         | 15.0                                        | 550 (349-797)                             | 182                        | 58                            |
| DC6                         | M/7             | 1387/393                   | 2.2                                                  | 4.8                                         | 19.3                                        | 1063 (822-1335)                           | 329                        | 57                            |
| DC7                         | M/5             | 3462/439                   | 1.4                                                  | 2.7                                         | 17.1                                        | 445 (381-515)                             | 85                         | 64                            |
| DC5                         | F/6             | 1610/386                   | 1.1                                                  | 11.5                                        | 11.8                                        | 591 (411-805)                             | 178                        | 59                            |
| DC2                         | F/8             | 921/379                    | 1.7                                                  | 9.5                                         | 9.7                                         | 511 (363-683)                             | 176                        | 56                            |
| <i>Humid Chaco/Pantanal</i> |                 |                            |                                                      |                                             |                                             |                                           |                            |                               |
| Pan2                        | F/2             | 1694/375                   | 1.1                                                  | 4.3                                         | 7.9                                         | 71 (58-85)                                | 24                         | 60                            |
| HC5                         | F/4             | 593/242                    | 0.5                                                  | 1.2                                         | 20.9                                        | 92 (75-110)                               | 23                         | 61                            |
| HC4                         | F/3             | 288/266                    | 1.5                                                  | 6.2                                         | 9.3                                         | 270 (187-369)                             | 86                         | 57                            |
| HC8                         | F/1             | 980/170                    | 0.2                                                  | 10.2                                        | 13.7                                        | 121 (71-183)                              | 32                         | 58                            |
| HC7                         | F/6             | 1668/324                   | 0.1                                                  | 9.2                                         | 22.3                                        | 246 (172-332)                             | 73                         | 57                            |

|      |      |          |     |     |      |                |     |    |
|------|------|----------|-----|-----|------|----------------|-----|----|
| HC9  | F/6  | 928/362  | 0.2 | 9.7 | 13.9 | 118 (83-159)   | 33  | 59 |
| Pan3 | M/6  | 727/192  | 1.4 | 3.4 | 16.6 | 428 (320-550)  | 134 | 57 |
| HC3  | M/4  | 983/143  | 1.4 | 4.4 | 15.0 | 424 (290-584)  | 138 | 56 |
| HC6  | M/10 | 660/133  | 0.9 | 5.5 | 13.4 | 341 (216-494)  | 91  | 60 |
| Pan1 | F/4  | 1695/366 | NA  | 3.5 | NA   | 550 (349-797)  | 21  | 60 |
| HC1  | M/6  | 148/88   | NA  | 5.9 | NA   | 958 (534-1505) | 283 | 58 |
| HC2  | F/6  | 280/54   | NA  | 5.7 | NA   | 73 (35-125)    | 22  | 57 |

492

493

494

495

496

497

498

499

500

501

502



503 Table 2. Probabilites, based upon posterior distributions, that home range and movement  
 504 parameters are different between sex and ecosystem, between sexes within systems, and between  
 505 same sexes between systems.

|                                                                  | Home range<br>(km <sup>2</sup> ) | Home range<br>crossing time<br>(days) | Velocity<br>autocorrelation<br>timescale (h) | Average distance<br>traveled<br>(km/day) |
|------------------------------------------------------------------|----------------------------------|---------------------------------------|----------------------------------------------|------------------------------------------|
| Dry Chaco male > Dry<br>Chaco female                             | 0.71                             | 0.08                                  | 0.71                                         | 0.89                                     |
| Humid<br>Chaco/Pantanal male ><br>Humid<br>Chaco/Pantanal female | 0.99                             | 0.17                                  | 0.95                                         | 0.52                                     |
| Dry Chaco male ><br>Humid<br>Chaco/Pantanal male                 | 0.91                             | 0.75                                  | 0.86                                         | 0.72                                     |
| Dry Chaco female ><br>Humid<br>Chaco/Pantanal female             | 0.99                             | 0.89                                  | 0.96                                         | 0.23                                     |
| All Dry Chaco > All<br>Humid<br>Chaco/Pantanal                   | 1                                | 0.77                                  | 0.99                                         | 0.61                                     |
| Male > Female                                                    | 0.99                             | 0.10                                  | 0.99                                         | 0.84                                     |

506

507 **Supplementary material**

508 Table A.1. Comparative home range sizes for study jaguars based upon autocorrelated kernel  
 509 density estimator (AKDE), 95% kernel density estimator (KDE), and 95% minimum convex  
 510 polygon (MCP).

| ID                          | Sex/age (yr) | AKDE Home range (km <sup>2</sup> )<br>(95% CI) | 95% KDE (km <sup>2</sup> ) | 95% MCP (km <sup>2</sup> ) |
|-----------------------------|--------------|------------------------------------------------|----------------------------|----------------------------|
| <i>Dry Chaco</i>            |              |                                                |                            |                            |
| DC1                         | M/5          | 2143 (1558-2820)                               | 1674                       | 1813                       |
| DC3                         | M/2          | 421 (288-580)                                  | 193                        | 152                        |
| DC4                         | M/5          | 550 (349-797)                                  | 453                        | 389                        |
| DC6                         | M/7          | 1063 (822-1335)                                | 877                        | 950                        |
| DC7                         | M/5          | 445 (381-515)                                  | 418                        | 587                        |
| DC5                         | F/6          | 591 (411-805)                                  | 479                        | 475                        |
| DC2                         | F/8          | 511 (363-683)                                  | 402                        | 298                        |
| <i>Humid Chaco/Pantanal</i> |              |                                                |                            |                            |
| Pan2                        | F/2          | 71 (58-85)                                     | 71                         | 87                         |
| HC5                         | F/4          | 92 (75-110)                                    | 102                        | 89                         |
| HC4                         | F/3          | 270 (187-369)                                  | 176                        | 151                        |
| HC7                         | F/1          | 121 (71-183)                                   | 87                         | 88                         |
| HC8                         | F/6          | 246 (172-332)                                  | 205                        | 184                        |
| HC9                         | F/6          | 118 (83-159)                                   | 87                         | 96                         |
| Pan3                        | M/6          | 428 (320-550)                                  | 350                        | 288                        |

|      |      |                |     |     |
|------|------|----------------|-----|-----|
| HC2  | M/4  | 424 (290-584)  | 302 | 255 |
| HC6  | M/10 | 341 (216-494)  | 280 | 256 |
| Pan1 | F/4  | 550 (349-797)  | 59  | 67  |
| HC1  | M/6  | 958 (534-1505) | 644 | 491 |
| HC3  | F/6  | 73 (35-125)    | 52  | 36  |

511

512

513

514

515

516

517

518

519

520

521

522

523

524 Figure 1. Map showing the distribution of the Dry and Humid Chaco and Pantanal in western  
525 Paraguay (Olson et al. 2001) and study areas where jaguar movements were monitored.

526 Figure 2. Home range and movement parameters of male and female jaguars across all study  
527 sites.

528 Figure 3. Home range and movement parameters for study jaguars in the Dry Chaco and Humid  
529 Chaco/Pantanal.

530 Figure 4. Home range and movement parameters of male and female jaguars in the Dry Chaco  
531 and Humid Chaco/Pantanal.

532 Figure 5. Mean male and female home ranges (error bars represent 95% confidence interval)  
533 from this study and AKDE estimates from Morato et al. (2016) by ecosystem. The numbers next  
534 to points represent sample size.

535 Figure 6. Mean of the mean distance traveled and the velocity autocorrelation timescale (error  
536 bars represent SE) of jaguars from this study and mean estimates from Morato et al. (2016) by  
537 ecosystem.

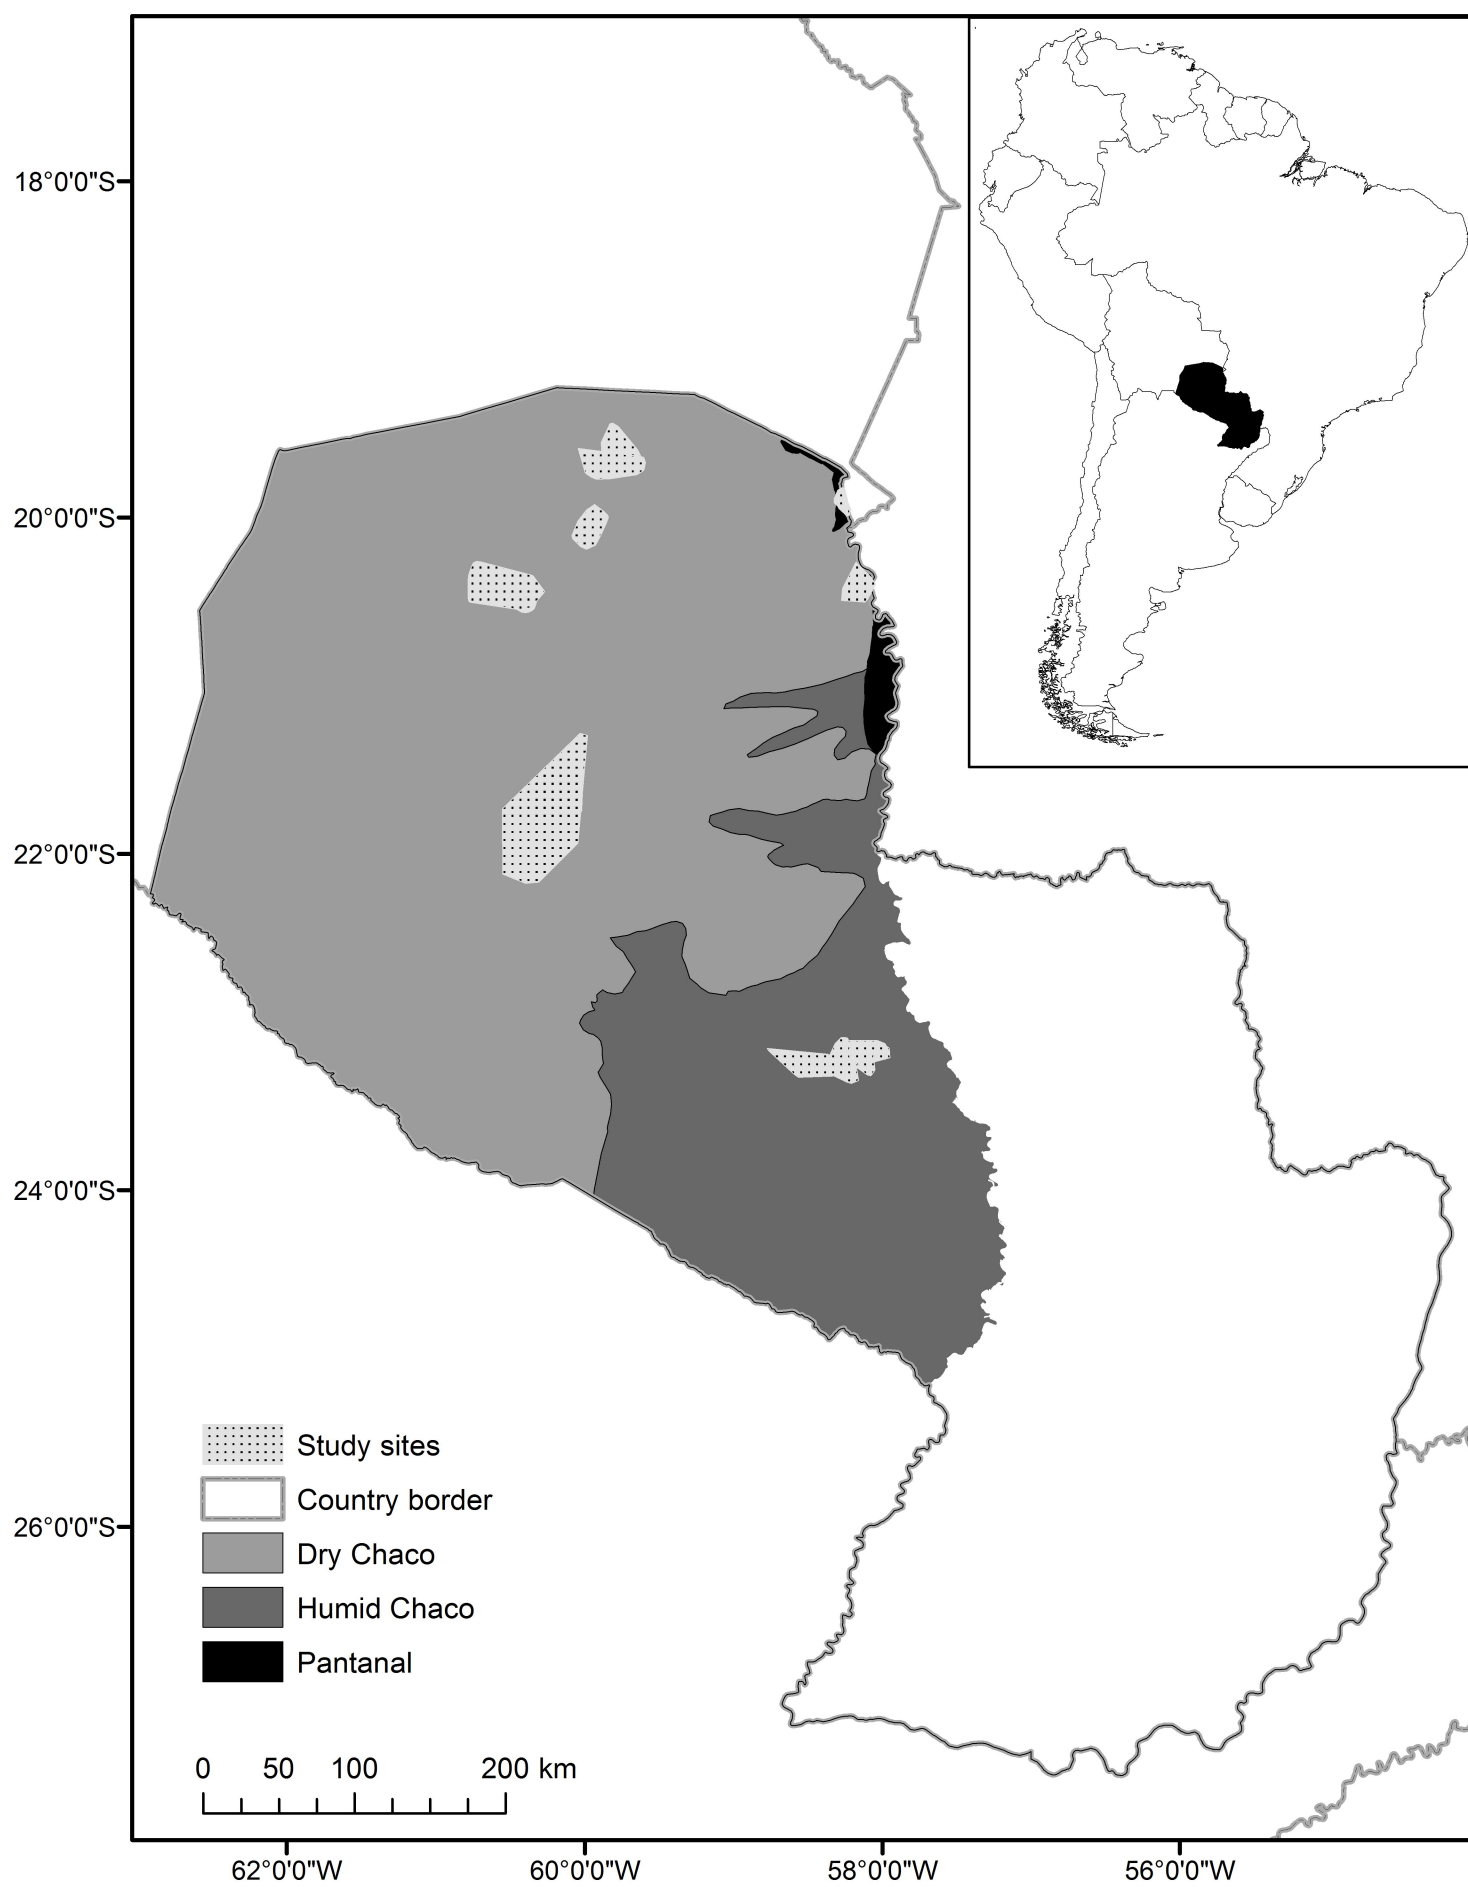

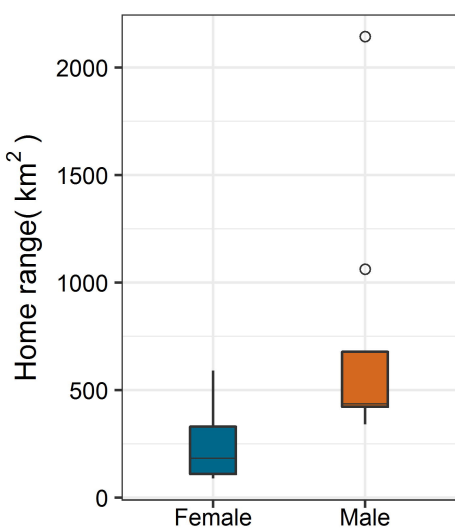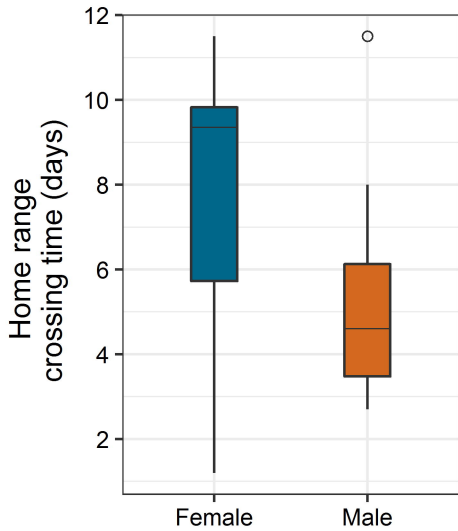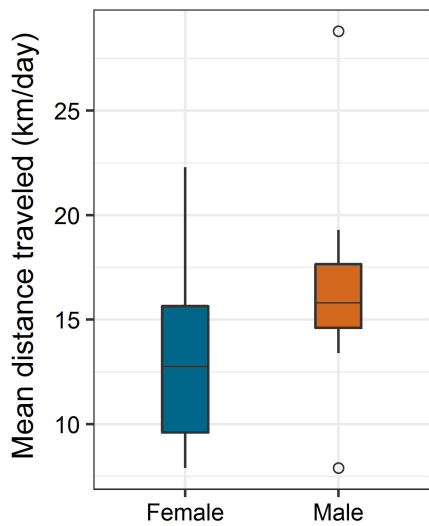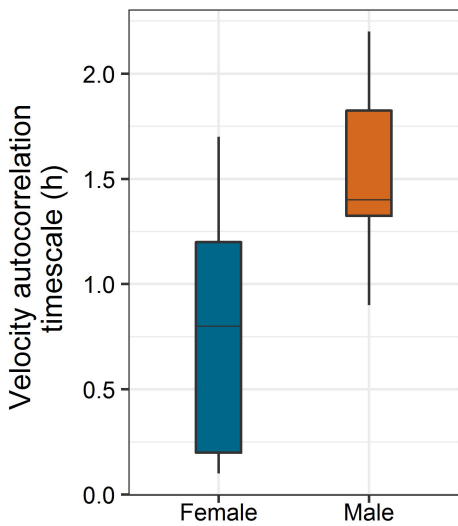

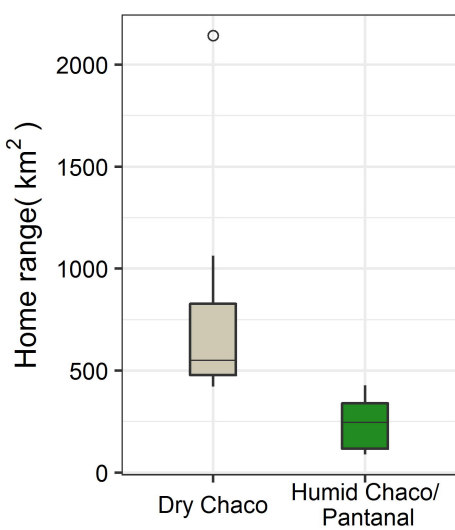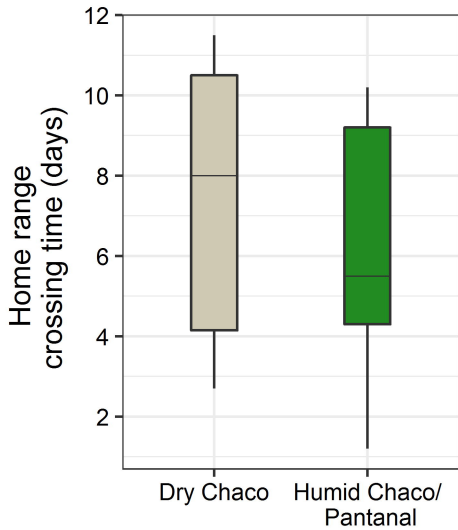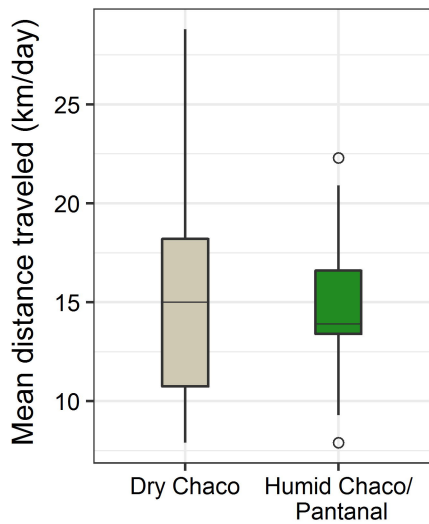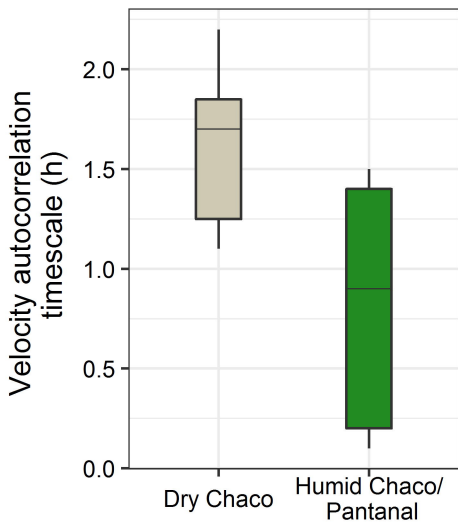

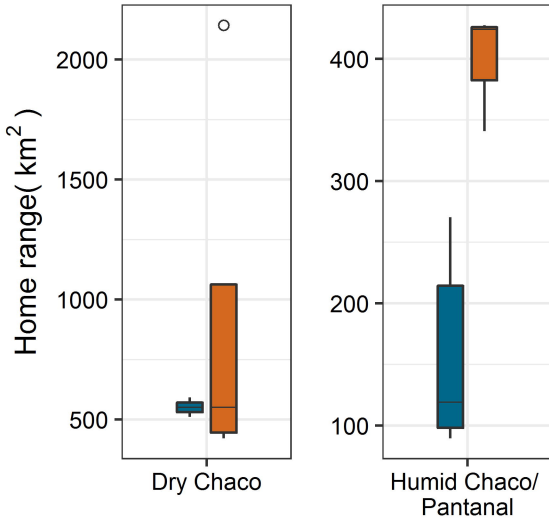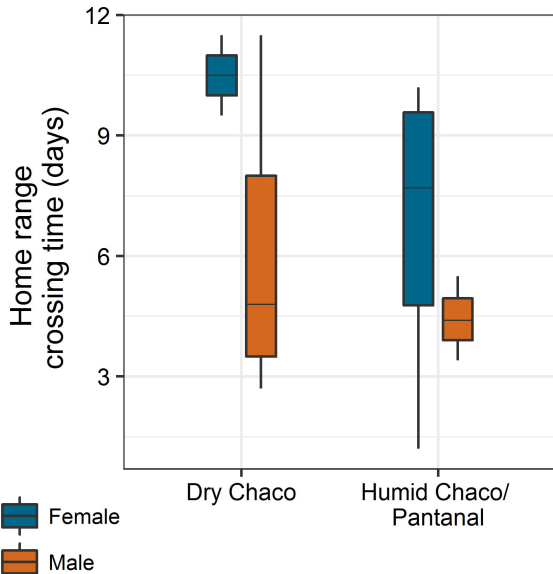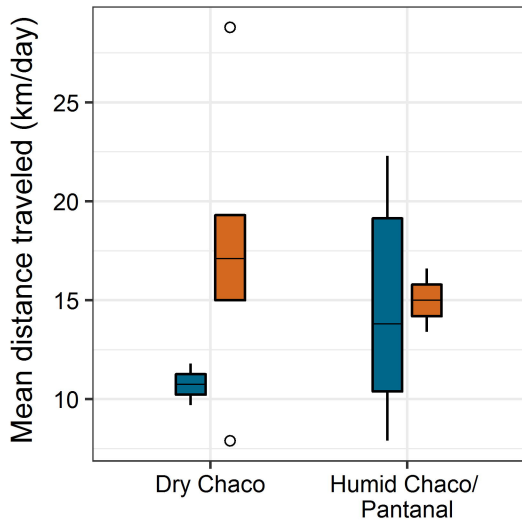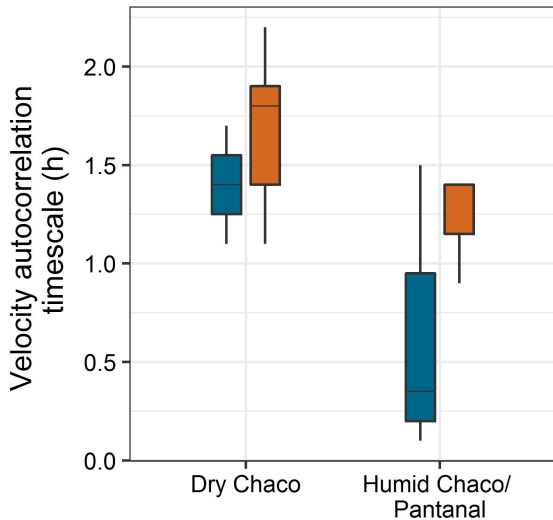



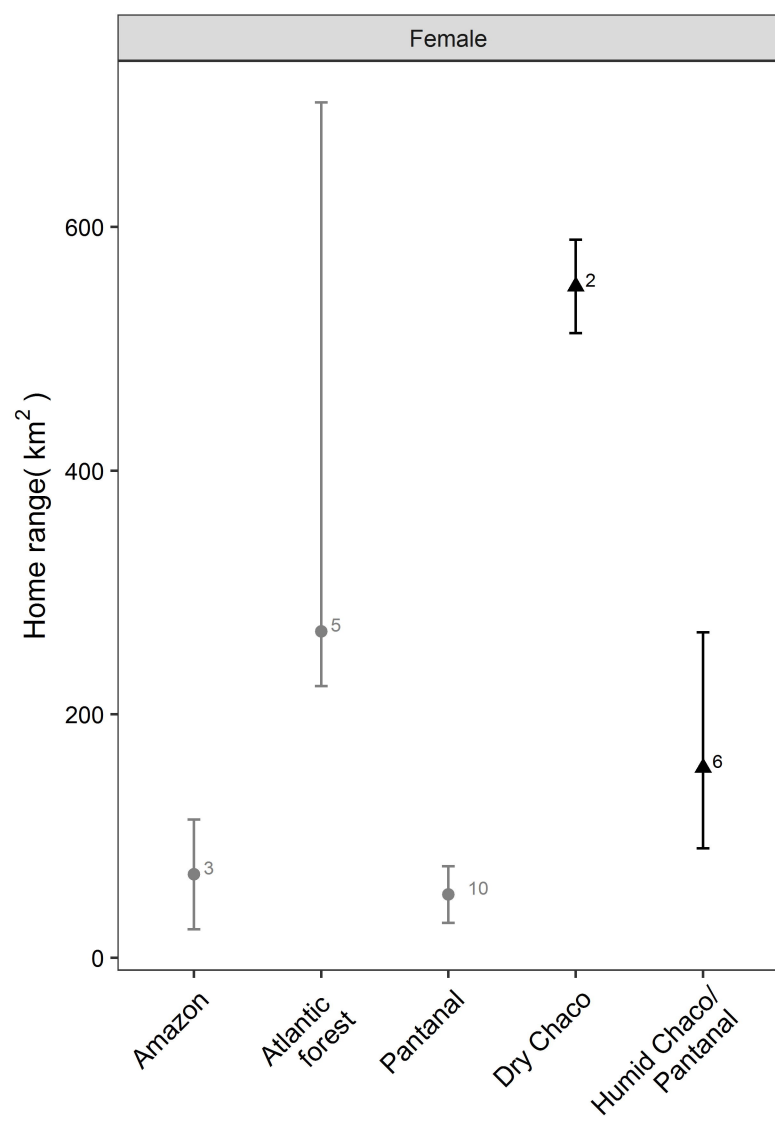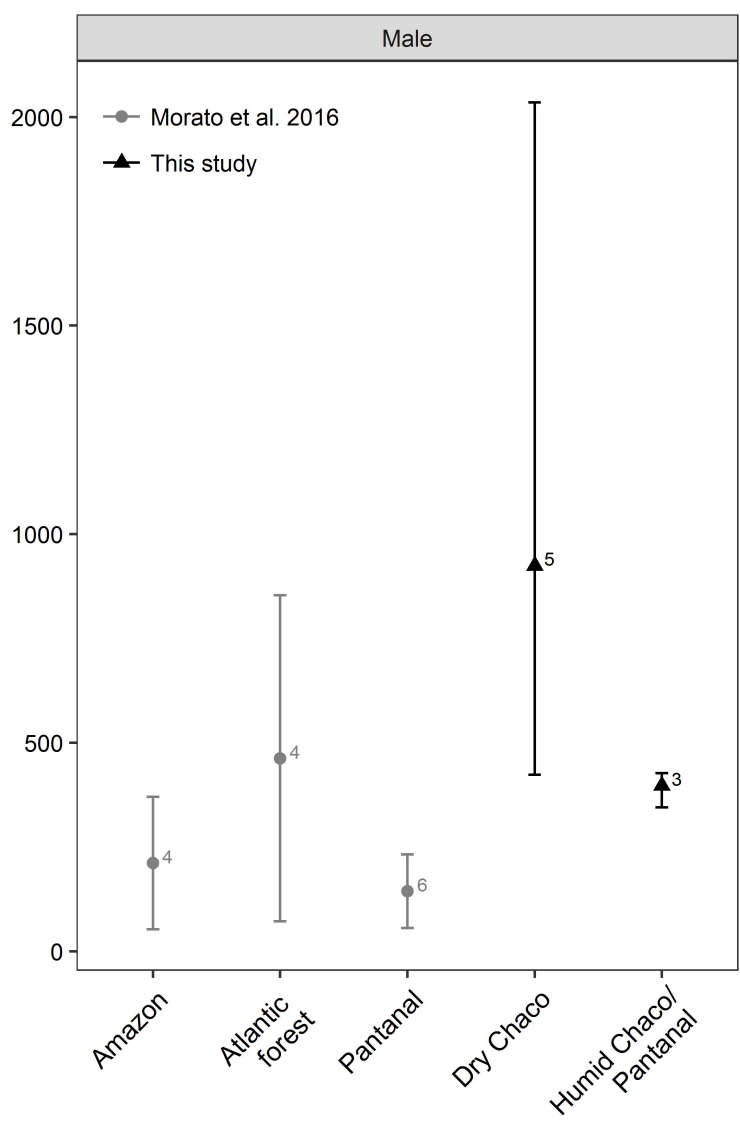

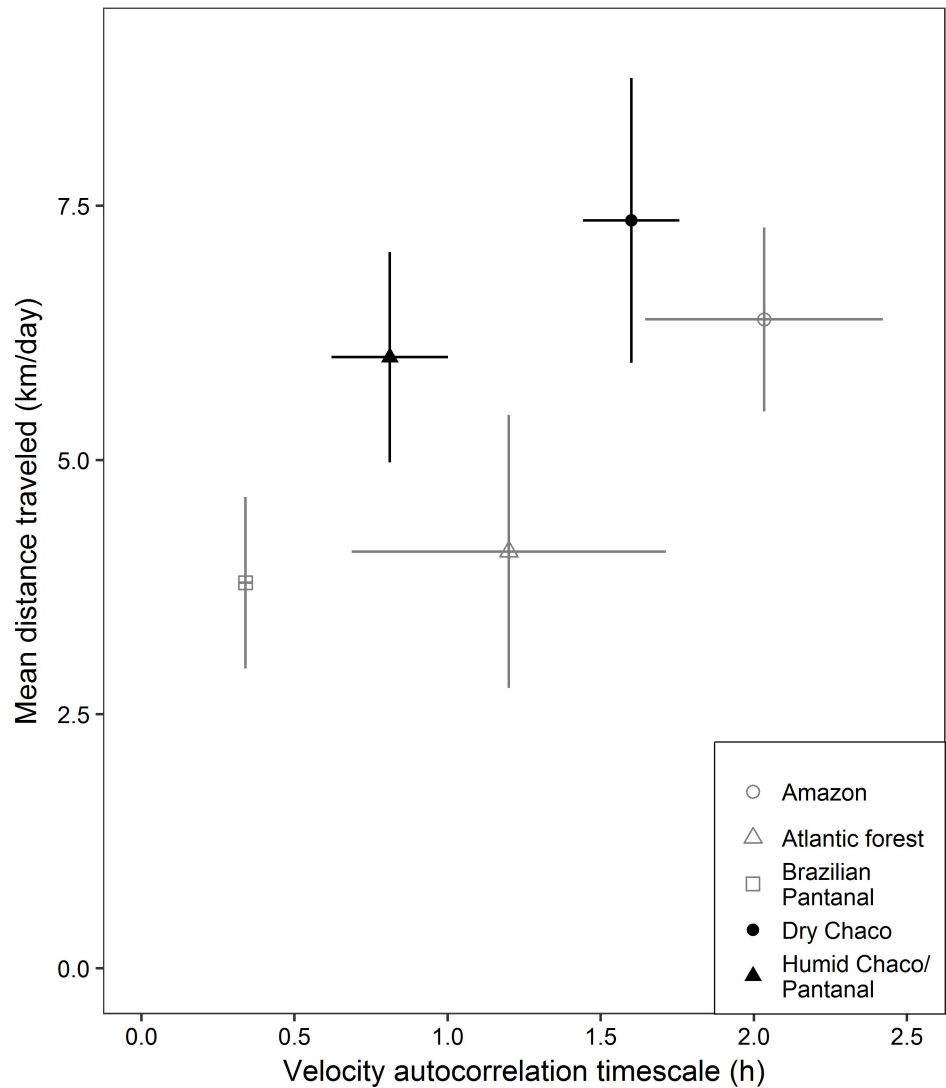

Source: http://www.biorxiv.org/content/10.1101/119412v3.full.pdf
